# Supplementary material
Source: PubMed Central journal article supplement (PMC5087728)
Supplement: supp_M116.750208_suppdata.pdf [file supp_M116.750208_suppdata.pdf]

Revised manuscript – Aug 31, 2016 (Original MS ID JBC/2016/721506, February 11; First Revision JBC/2016/750208, July 25, 2016; Second Revision JBC/2016/750208, August 29, 2016)

**SUPPLEMENTAL INFORMATION**

**A novel F<sub>420</sub>-dependent Thioredoxin Reductase Gated by Low Potential FAD:  
A Tool for Redox Regulation in an Anaerobe**

Dwi Susanti<sup>‡</sup>, Usha Loganathan<sup>‡</sup>, Biswarup Mukhopadhyay<sup>‡, §, ¶, 1</sup>

From the <sup>‡</sup>Department of Biochemistry, <sup>§</sup>Biocomplexity Institute, and <sup>¶</sup>Virginia Tech Carilion School of Medicine, Virginia Tech, Blacksburg, VA 24061, USA

Running title: *A Novel Deazaflavin:Thioredoxin Reductase*

**<sup>1</sup>To whom correspondence should be addressed:** Biswarup Mukhopadhyay, Department of Biochemistry, Engel Hall, 340 West Campus Drive, Blacksburg, VA 24061; phone: 540 231 1219; e-mail: biswarup@vt.edu

**Table S1. Thioredoxins and thioredoxin reductases of selected methanogens presented in Figure 8**

| <b>Order</b><br><b>Organism</b>                           | <b>NCBI Protein Accession Number</b> |                |                |                                                                      |
|-----------------------------------------------------------|--------------------------------------|----------------|----------------|----------------------------------------------------------------------|
|                                                           | <b>DTR</b>                           | <b>NTR</b>     | <b>FTR</b>     | <b>Trx</b>                                                           |
| <b><i>Methanopyrales</i></b>                              |                                      |                |                |                                                                      |
| <i>Methanopyrus kandleri</i> AV19                         | -                                    | WP_011019929.1 | -              | -                                                                    |
| <b><i>Methanococcales</i></b>                             |                                      |                |                |                                                                      |
| <i>Methanocaldococcus infernus</i> ME                     | WP_013099833.1                       | -              | -              | YP_003616341.1<br>YP_003616835.1                                     |
| <i>Methanocaldococcus</i> sp. FS406-22                    | WP_012980345.1                       | -              | -              | YP_003458495.1<br>YP_003458967.1                                     |
| <i>Methanocaldococcus fervens</i> AG86                    | WP_015792073.1                       | -              | -              | YP_003128641.1<br>YP_003128672.1                                     |
| <i>Methanocaldococcus vulcanius</i> M7                    | WP_015733468.1                       | -              | -              | YP_003247556.1<br>YP_003247403.1                                     |
| <i>Methanocaldococcus jannaschii</i> DSM 2661             | Q58931.1                             | -              | -              | NP_247280.1<br>NP_247560.1                                           |
| <i>Methanotorris igneus</i> Kol 5                         | WP_013798844.1                       | -              | -              | YP_004484305.1<br>YP_004483931.1<br>YP_004484086.1<br>YP_004484049.1 |
| <i>Methanothermococcus thermolithotrophicus</i> ATCC35097 | WP_026182944                         | -              | -              | WP_018154025.1<br>WP_018154347.1<br>WP_018153852.1                   |
| <i>Methanococcus aeolicus</i> Nankai-3                    | WP_011973481.1                       | -              | -              | YP_001324655.1<br>YP_001324701.1<br>YP_001324529.1                   |
| <i>Methanothermococcus okinawensis</i> IH1                | AEH07436.1                           | -              | -              | YP_004576182.1<br>YP_004577272.1<br>YP_004577341.1                   |
| <i>Methanococcus maripaludis</i> S2                       | WP_011170903.1                       | -              | -              | NP_988508.1<br>NP_987323.1<br>NP_988755.1                            |
| <i>Methanococcus vannielii</i> SB                         | WP_011971966.1                       | -              | -              | YP_001323456.1<br>YP_001323216.1<br>YP_001324188.1                   |
| <i>Methanococcus voltae</i> A3                            | WP_013180053.1                       | -              | -              | YP_003707881.1<br>YP_003707614.1                                     |
| <b><i>Methanobacteriales</i></b>                          |                                      |                |                |                                                                      |
| <i>Methanothermus fervidus</i> DSM 2088                   | -                                    | WP_013413587.1 | -              | YP_004004242.1                                                       |
| <i>Methanothermobacter marburgensis</i> str. Marburg      | -                                    | WP_013295913.1 | WP_013295001.1 | YP_003850191.1<br>YP_003850106.1                                     |
| <i>Methanothermobacter thermautotrophicus</i> str. ΔH     | -                                    | AAB85213.1     | WP_010877186.1 | NP_276032.1<br>NP_275946.1                                           |
| <i>Methanosphaera stadtmanae</i> DSM 3091                 | -                                    | WP_011406983.1 | -              | YP_447852.1<br>YP_447165.1                                           |
| <i>Methanobacterium paludis</i> sp. SWAN-1                | -                                    | WP_013824744.1 | -              | YP_004519553.1                                                       |

Continued/-

**Table S1. Thioredoxins and thioredoxin reductases of selected methanogens presented in Figure 8 (Continued)**

| Order<br>Species name                        | NCBI Protein Accession Number |                |                                                    |                                                                                                                      |
|----------------------------------------------|-------------------------------|----------------|----------------------------------------------------|----------------------------------------------------------------------------------------------------------------------|
|                                              | DTR                           | NTR            | FTR                                                | Trx                                                                                                                  |
| <i>Methanobacterium lacus</i> sp. AL-21      | -                             | WP_013646010.1 |                                                    | YP_004291104.1                                                                                                       |
| <i>Methanobrevibacter ruminantium</i> M1     | -                             | ADC47275.1     | -                                                  | YP_003424420.1                                                                                                       |
| <i>Methanobrevibacter smithii</i> ATCC 35061 | -                             | WP_004034556.1 | -                                                  | YP_001273411.1                                                                                                       |
| <i>Methanobrevibacter wolinii</i> SH         | -                             | WP_042707727.1 | -                                                  | WP_042706851.1                                                                                                       |
| <b>Methanomicrobiales</b>                    |                               |                |                                                    |                                                                                                                      |
| <i>Methanosaeta harundinacea</i> 6Ac         | -                             | AET63616.1     | WP_014587647.1                                     | YP_005920527.1<br>YP_005920150.1<br>YP_005919905.1<br>YP_005920855.1                                                 |
| <i>Methanosaeta thermophila</i> PT           | -                             | ABK14932.1     | ABK14695.1                                         | YP_843556.1<br>YP_843121.1<br>YP_843141.1                                                                            |
| <i>Methanosaeta concilii</i> GP6             | -                             | WP_013719139.1 | WP_013718007.1                                     | YP_004385149.1<br>YP_004383748.1<br>YP_004385304.1<br>YP_004382986.1                                                 |
| <i>Methanosalsum zhilinae</i> DSM 4017       | -                             | WP_013898016.1 | WP_013897959.1<br>WP_013899231.1                   | YP_004615470.1<br>YP_004615797.1<br>YP_004616482.1<br>YP_004615169.1<br>YP_004615284.1                               |
| <i>Methanohalobium evestigatum</i> Z-7303    | -                             | WP_013194180.1 | WP_013194855.1<br>WP_013195589.1                   | YP_003725801.1<br>YP_003726675.1<br>YP_003726409.1<br>YP_003726719.1<br>YP_003725836.1                               |
| <i>Methanomethylovorans hollandica</i>       | -                             | WP_015324339.1 | WP_015325159.1<br>WP_015325586.1<br>WP_015323758.1 | WP_015325246.1<br>WP_015324323.1                                                                                     |
| <i>Methanococcoides burtonii</i> DSM 6242    | -                             | WP_011498283.1 | WP_048063468.1<br>WP_011500370.1                   | YP_566484.1<br>YP_564870.1<br>YP_564987.1<br>YP_565635.1<br>YP_565021.1<br>YP_566957.1<br>YP_565881.1<br>YP_566314.1 |
| <i>Methanohalophilus mahii</i> DSM 5219      | -                             | WP_013037647.1 | WP_013037416.1<br>WP_013037976.1                   | YP_003542631.1<br>YP_003542351.1<br>YP_003541974.1<br>YP_003542119.1<br>YP_003543047.1<br>YP_003542300.1             |

Continued/-

**Table S1. Thioredoxins and thioredoxin reductases of selected methanogens presented in Figure 8 (Continued)**

| Order | NCBI Protein Accession Number             |     |                                                |                                                    |                                                                                                                                     |
|-------|-------------------------------------------|-----|------------------------------------------------|----------------------------------------------------|-------------------------------------------------------------------------------------------------------------------------------------|
|       | Species name                              | DTR | NTR                                            | FTR                                                | Trx                                                                                                                                 |
|       | <i>Methanobrevibacter smithii</i> R15     | -   | AFV23072.1                                     | WP_015054856.1<br>WP_015053933.1<br>WP_015053273.1 | YP_006921816.1<br>YP_006923638.1<br>YP_006922441.1<br>YP_006922879.1<br>YP_006921643.1                                              |
|       | <i>Methanosarcina mazei</i> Gö1           | -   | WP_011034277.1                                 | WP_011032011.1<br>WP_011035159.1                   | NP_632761.1<br>NP_632460.1<br>NP_634273.1<br>NP_634378.1<br>NP_633015.1<br>NP_634264.1<br>NP_634103.1                               |
|       | <i>Methanosarcina acetivorans</i> C2A     | -   | AAM04784.1                                     | WP_011022822.1<br>WP_048065175.1                   | YP_306068.1<br>YP_304192.1<br>YP_307062.1<br>YP_305238.1<br>NP_616305.1<br>NP_618813.1<br>NP_619119.1<br>NP_618103.1                |
|       | <i>Methanosarcina barkeri</i> str. Fusaro | -   | WP_011307837.1                                 | WP_011307856.1<br>WP_048102842.1                   | YP_303720.1<br>YP_305814.1<br>YP_305788.1<br>YP_305232.1<br>YP_305379.1<br>YP_306068.1<br>YP_304192.1<br>YP_307062.1<br>YP_305238.1 |
|       | <i>Methanocella arvoryzae</i> MRE50       | -   | CAJ38047                                       | WP_048198866.1<br>WP_012035034.1                   | YP_686211.1<br>YP_684546.1<br>YP_685724.1<br>YP_685723.1                                                                            |
|       | <i>Methanocella paludicola</i> SANAE      | -   | BAI61976.1<br>BAI60692.1<br>BAI60752.1         | BAI61049.1<br>BAI62469.1                           | YP_003355731.1<br>YP_003357232.1<br>YP_003355094.1<br>YP_003357453.1<br>YP_003356785.1<br>YP_003357331.1                            |
|       | <i>Methanocella conradii</i> HZ254        | -   | WP_014406803.1<br>WP_014405558.1<br>AFD00237.1 | -                                                  | YP_005379709.1<br>YP_005380235.1<br>YP_005381598.1                                                                                  |
|       | <i>Methanosphaerula palustris</i> E1-9c   | -   | WP_012617099.1                                 | WP_012617650.1<br>WP_012617194.1                   | YP_002466095.1<br>YP_002467560.1<br>YP_002466961.1                                                                                  |
|       | <i>Methanospirillum hungatei</i> JF-1     | -   | ABD42736                                       | WP_011448273.1<br>WP_011447956.1                   | YP_502331.1<br>YP_503912.1<br>YP_502981.1<br>YP_504576.1<br>YP_502286.1                                                             |

Continued/-

**Table S1. Thioredoxins and thioredoxin reductases of selected methanogens presented in Figure 8 (Continued)**

| <b>Order</b><br>Species name                | <b>NCBI Protein Accession Number</b> |                |                                                    |                                                                                        |
|---------------------------------------------|--------------------------------------|----------------|----------------------------------------------------|----------------------------------------------------------------------------------------|
|                                             | <b>DTR</b>                           | <b>NTR</b>     | <b>FTR</b>                                         | <b>Trx</b>                                                                             |
| <i>Methanoregula boonei</i> 6A8             | -                                    | ABS54608.1     | WP_012107777.1<br>WP_012106373.1                   | YP_001403264.1<br>YP_001404957.1<br>YP_001403239.1<br>WP_015285335.1                   |
| <i>Methanoregula formicica</i> SMSP         | -                                    | AGB01149       | WP_048111086.1<br>WP_015286077.1                   | YP_006545581.1<br>YP_006543753.1<br>YP_006543653.1<br>YP_006543652.1                   |
| <i>Methanoculleus bourgensis</i> MS1        | -                                    | WP_014865992.1 | WP_014866447.1<br>WP_014868468.1                   | YP_001046143.1<br>YP_001047567.1<br>YP_001045935.1<br>YP_001045936.1<br>YP_001047892.1 |
| <i>Methanoculleus marisnigri</i> JR1        | -                                    | ABN56104.1     | WP_011844677.1<br>WP_011845284.1                   | YP_001030253.1<br>YP_001029754.1                                                       |
| <i>Methanocorpusculum labreanum</i> Z       | -                                    | WP_011833868.1 | WP_011832588.1                                     | WP_004078007.1                                                                         |
| <i>Methanoplanus limicola</i> DSM 2279      | -                                    | WP_004079794.1 | WP_004078612.1<br>WP_004076569.1<br>WP_004075880.1 |                                                                                        |
| <i>Methanolacinia petrolearia</i> DSM 11571 | -                                    | ADN37372.1     | WP_013328670.1<br>WP_013329279.1                   | YP_003894886.1<br>YP_003893564.1<br>YP_003895646.1<br>YP_003894694.1                   |

**Table S2. Selected flavin containing thioredoxin reductases as presented in Figure 9**

| Label             | Organism name                               | NCBI protein accession number | References |
|-------------------|---------------------------------------------|-------------------------------|------------|
| <i>A.fulgidus</i> | <i>Archaeoglobus fulgidus</i>               | WP_01087905.1.1               | (1)        |
| <i>A.pernix</i>   | <i>Aeropyrum pernix K1</i>                  | BAA80046                      |            |
| <i>A.profundu</i> | <i>Archaeoglobus profundus</i>              | WP_012939759.1                |            |
| <i>A.saccharo</i> | <i>Acidolobus saccharovorans</i>            | WP_013266177.1                |            |
| <i>A.veneficu</i> | <i>Archaeoglobus veneficus</i>              | WP_013684632.1                |            |
| <i>B.fragilis</i> | <i>Bacteroides fragilis</i>                 | WP_010536932.1                |            |
| <i>C.aceti</i>    | <i>Clostridium acetibutylicum</i>           | _1 WP_010964187.1             | (2)        |
|                   |                                             | _2 WP_010966363.1             |            |
|                   |                                             | _3 WP_010964856.1             |            |
| <i>C.pasteu</i>   | <i>Clostridium pasteurianum</i>             | _1 WP_015617437               |            |
|                   |                                             | _2 WP_003445687.1             |            |
| <i>C.symbiosu</i> | <i>Cenarchaeum symbiosum A</i>              | ABK76999.1                    |            |
| <i>D.desul</i>    | <i>Desulfovibrio desulfuricans</i>          | _1 WP_014320910.1             |            |
|                   |                                             | _2 WP_014322191.1             |            |
|                   |                                             | _3 WP_014321324.1             |            |
| <i>D.fermenta</i> | <i>Desulfurococcus fermentans</i>           | WP_014768119.1                | (4)        |
| <i>D.kamchat</i>  | <i>Desulfurococcus kamchatkensis</i>        | ACL11588.1                    |            |
|                   |                                             | _1 AAS96314.1                 |            |
|                   |                                             | _2 AAS94860.1                 |            |
|                   |                                             | _3 AAS95935.1                 |            |
| <i>E.coli</i>     | <i>Escherichia coli</i>                     | EGJ07907                      | (4)        |
| <i>F.acidar</i>   | <i>Ferroplasma acidarmanus</i>              | _1 WP_009886661.1             |            |
|                   |                                             | _2 WP_009886229.1             |            |
| <i>F.placidus</i> | <i>Ferroglobus placidus</i>                 | WP_012966986.1                | (4)        |
| <i>H. walsb</i>   | <i>Haloquadratum walsbyi</i>                | _1 WP_011570931.1             |            |
|                   |                                             | _2 WP_011570872.1             |            |
| <i>H.borin</i>    | <i>Halogeometricum borinquense DSM11551</i> | _1 WP_006056860.1             |            |
|                   |                                             | _2 WP_013440645.1             |            |
|                   |                                             | _3 ELY23545.1                 |            |
| <i>H.butylicu</i> | <i>Hyperthermus butylicus</i>               | WP_011821369.1                | (4)        |
| <i>H.jeotgali</i> | <i>Halalkalicoccus jeotgali</i>             | WP_008417299.1                |            |
| <i>H.lacus</i>    | <i>Halorubrum lacusprofundi</i>             | _1 WP_012659568.1             |            |
|                   |                                             | _2 WP_015909766.1             |            |
|                   |                                             | _1 WP_007190140.1             |            |
| <i>H.marism</i>   | <i>Haloarcula marismortui ATCC 43049</i>    | _2 WP_049938535.1             |            |
|                   |                                             | _3 AAV44795.1                 |            |
| <i>H.salinaru</i> | <i>Halobacterium salinarum</i>              | WP_010902912.1                |            |
|                   |                                             | _1 WP_008526266.1             |            |
| <i>H.tiama</i>    | <i>Halorhabdus tiamatea</i>                 | _2 WP_008528393.1             |            |
|                   |                                             | _3 WP_008523862.1             |            |
|                   |                                             | _1 WP_012943598.1             |            |
| <i>H.turkm</i>    | <i>Haloterrigena turkmenica</i>             | _2 WP_012945283.1             |            |

Continued/-

**Table S2. Selected flavin containing thioredoxin reductases as presented in Figure 9 (Continued)**

| Label              | Organism name                                   | NCBI protein accession number                               | References |
|--------------------|-------------------------------------------------|-------------------------------------------------------------|------------|
| <i>H.volcan</i>    | <i>Haloferax volcanii</i>                       | _1 WP_004043814.1<br>_2 WP_004043912.1<br>_3 WP_004040826.1 |            |
| <i>I.hospital</i>  | <i>Ignicoccus hospitalis</i>                    | WP_012123055.1                                              |            |
| <i>L.casei</i>     | <i>Lactobacillus casei</i>                      | WP_012491289.1                                              |            |
| <i>M. mazei</i>    | <i>Methanosarcina mazei</i>                     | WP_011034277.1                                              |            |
| <i>M. thermoli</i> | <i>Methanothermococcus thermolithotrophicus</i> | WP_026182944.1                                              |            |
| <i>M.acetivor</i>  | <i>Methanosarcina acetivorans C2A</i>           | AAM04784.1                                                  | (5)        |
| <i>M.aeolicus</i>  | <i>Methanococcus aeolicus</i>                   | WP_011973481.1                                              |            |
| <i>M.arvoryza</i>  | <i>Methanocella arvoryzae MRE50</i>             | _1 WP_048198865.1<br>_2 WP_012034618.1                      |            |
| <i>M.barkeri</i>   | <i>Methanosarcina barkeri</i>                   | WP_011307837.1                                              |            |
| <i>M.boonei</i>    | <i>Methanoregula boonei 6A8</i>                 | ABS54608.1                                                  |            |
| <i>M.bourgens</i>  | <i>Methanoculleus bourgensis</i>                | WP_014865992.1                                              |            |
| <i>M.burtonii</i>  | <i>Methanococcoides burtonii</i>                | WP_011498283.1                                              |            |
| <i>M.concilia</i>  | <i>Methanosaeta concilia</i>                    | WP_013719139.1                                              |            |
| <i>M.conradii</i>  | <i>Methanocella conradii HZ254</i>              | _1 WP_014406803.1<br>_2 WP_014405558.1<br>_3 AFD00237.1     |            |
| <i>M.evestiga</i>  | <i>Methanohalobium evestigatum</i>              | WP_013194180.1                                              |            |
| <i>M.fervens</i>   | <i>Methanocaldococcus fervens</i>               | WP_015792073.1                                              |            |
| <i>M.fervidus</i>  | <i>Methanothermus fervidus</i>                  | WP_013413587.1                                              |            |
| <i>M.FS406-22</i>  | <i>Methanocaldococcus sp. FS406-22</i>          | WP_012980345.1                                              |            |
| <i>M.harundin</i>  | <i>Methanosaeta harundinacea</i>                | WP_014585804.1                                              |            |
| <i>M.hungatei</i>  | <i>Methanospirillum hungatei JF-1</i>           | ABD42736.1                                                  |            |
| <i>M.igneus</i>    | <i>Methanotorris igneus</i>                     | WP_013798844.1                                              |            |
| <i>M.infernus</i>  | <i>Methanocaldococcus infernus</i>              | WP_013099833.1                                              |            |
| <i>M.jannasch</i>  | <i>Methanocaldococcus jannaschii</i>            | Q58931                                                      | This study |
| <i>M.kandleri</i>  | <i>Methanopyrus kandleri</i>                    | WP_011019929.1                                              |            |
| <i>M.labreanu</i>  | <i>Methanocorpusculum labreanu</i>              | WP_011833868.1                                              |            |
| <i>M.mahii</i>     | <i>Methahalophilus mahii</i>                    | WP_013037647.1                                              |            |
| <i>M.marburge</i>  | <i>Methanothermobacter marburgnesis</i>         | WP_013295913.1                                              |            |
| <i>M.maripalu</i>  | <i>Methanococcus maripaludis S2</i>             | WP_011170903.1                                              |            |
| <i>M.marisnig</i>  | <i>Methanoculleus marisnigri JR1</i>            | ABN56104.1                                                  |            |
| <i>M.okinawen</i>  | <i>Methanococcus okinawensis</i>                | WP_013867617.1                                              |            |

**Continued/-**

**Table S2. Selected flavin containing thioredoxin reductases as presented in Figure 9 (Continued)**

| Label             | Organism name                                                | NCBI protein accession number | References |
|-------------------|--------------------------------------------------------------|-------------------------------|------------|
| <i>M.paludi</i>   | <i>Methanocella paludicola</i> SANA E                        | _1 BAI61976.1                 |            |
|                   |                                                              | _2 BAI60692.1                 |            |
|                   |                                                              | _3 BAI60752.1                 |            |
| <i>M.palustri</i> | <i>Methanospaerula palustris</i>                             | WP_012617099.1                |            |
| <i>M.petrolea</i> | <i>Methanolacinia petrolearia</i> DSM11571                   | ADN37372.1                    |            |
| <i>M.psychrop</i> | <i>Methanobolus psychrophilus</i> R15                        | AFV23072.1                    |            |
| <i>M.ruminant</i> | <i>Methanobrevibacter ruminantium</i> M1                     | WP_004034556.1                |            |
| <i>M.sedula</i>   | <i>Methanosphaera sedula</i>                                 | WP_012020594.1                |            |
| <i>M.smithii</i>  | <i>Methanobrevibacter smithii</i>                            | WP_004034556.1                |            |
| <i>M.stadtman</i> | <i>Methanospaera stadtmanae</i>                              | WP_011406983.1                |            |
| <i>M.thermaut</i> | <i>Methanothermobacter thermautotrophicus</i> strain Delta H | AAB85213.1                    |            |
| <i>M.thermop</i>  | <i>Methanosaeta thermophile</i>                              | WP_011696325.1                |            |
| <i>M.vanniell</i> | <i>Methanococcus vanniellii</i>                              | WP_011971966.1                |            |
| <i>M.villosus</i> | <i>Methanocaldococcus villosus</i>                           | WP_026152912.1                |            |
| <i>M.voltae</i>   | <i>Methanococcus voltae</i>                                  | WP_013180053.1                |            |
| <i>M.vulvaniu</i> | <i>Methanocaldococcus vulcanius</i>                          | WP_015733468.1                |            |
| <i>M.zhilinae</i> | <i>Methanosalsum zhilinae</i>                                | WP_013898016.1                |            |
| <i>N.asia</i>     | <i>Natrialba asiatica</i>                                    | _1 WP_006108828.1             |            |
|                   |                                                              | _2 WP_006107481.1             |            |
|                   |                                                              | _3 WP_006111138.1             |            |
| <i>N.equitans</i> | <i>Nanoarchaeum equitans</i>                                 | AAR39333.1                    |            |
| <i>N.magadi</i>   | <i>Natrialba magadii</i>                                     | _1 WP_004266946.1             |            |
|                   |                                                              | _2 WP_004216554.1             |            |
|                   |                                                              | _3 WP_004216895.1             |            |
|                   |                                                              | _4 WP_004267016.1             |            |
| <i>N.pharao</i>   | <i>Natromonas pharaonis</i>                                  | _1 WP_011323056.1             |            |
|                   |                                                              | _2 WP_011322420.1             |            |
| <i>P.abyssi</i>   | <i>Pyrococcus abyssi</i> GE5                                 | CAB49645.1                    |            |
| <i>P.aero</i>     | <i>Pyrobaculum aerophilum</i> str. IM2                       | _1 AAL64407.1                 |            |
|                   |                                                              | _2 AAL63684.1                 |            |
| <i>P.furiosus</i> | <i>Pyrococcus furiosus</i> DSM 3638                          | AAL81546.1                    |            |
| <i>P.island</i>   | <i>Pyrobaculum islandium</i>                                 | WP_011763430.1                |            |
| <i>P.torridus</i> | <i>Picrophilus torridus</i>                                  | WP_011177535.1                |            |
| <i>S.acido</i>    | <i>Sulfolobus acidocaldarius</i>                             | _1 WP_011277795.1             |            |
|                   |                                                              | _2 WP_011278018.1             |            |
| <i>S.marinus</i>  | <i>Staphylothermus marinus</i>                               | WP_011839218.1                |            |
| <i>S.solfa</i>    | <i>Sulfolobus solfataricus</i>                               | _1 WP_010923960.1             | (6, 7)     |
|                   |                                                              | _2 WP_009989411.1             |            |
| <i>S.tokodai</i>  | <i>Sulfolobus tokodai</i> str.7                              | BAB65543.1                    |            |
| <i>T.acido</i>    | <i>Thermoplasma acidophilum</i>                              | WP_010901395.1                | (8)        |

Continued/-



**Table S2. Selected flavin containing thioredoxin reductases as presented in Figure 9 (Continued)**

| <b>Label</b>       | <b>Organism name</b>             | <b>NCBI prote in accession number</b> | <b>References</b> |
|--------------------|----------------------------------|---------------------------------------|-------------------|
| <i>T.aggregan</i>  | <i>Thermosphaera aggragans</i>   | WP_013130151.1                        |                   |
| <i>T.barophil</i>  | <i>Thermococcus barophilus</i>   | WP_013467810.1                        |                   |
| <i>T.kodakaren</i> | <i>Thermococcus kodakarensis</i> | WP_011251050.1                        |                   |
| <i>T.maritima</i>  | <i>Thermotoga maritima</i>       | WP_004080734                          | (9)               |
| <i>T.onnurine</i>  | <i>Thermococcus onnurineus</i>   | WP_012572565.1                        |                   |
| <i>T.pendens</i>   | <i>Thermoifilum pendens</i>      | WP_052885356.1                        |                   |
| <i>T.tenax</i>     | <i>Thermoproteus tenax</i>       | WP_014127378.1                        |                   |
| <i>T.volvanic</i>  | <i>Thermoplasma volcanicum</i>   | BAB60295.1                            |                   |

## References

1. Jeon SJ & Ishikawa K (2002) Identification and characterization of thioredoxin and thioredoxin reductase from *Aeropyrum pernix* K1. *European journal of biochemistry / FEBS* 269(22):5423-5430.
2. Hammel KE, Cornwell KL, & Buchanan BB (1983) Ferredoxin Flavoprotein-Linked Pathway for the Reduction of Thioredoxin. *P Natl Acad Sci-Biol* 80(12):3681-3685.
3. Sarin R & Sharma YD (2006) Thioredoxin system in obligate anaerobe *Desulfovibrio desulfuricans*: Identification and characterization of a novel thioredoxin 2. *Gene* 376(1):107-115.
4. Pieulle L, *et al.* (2011) Study of the Thiol/Disulfide Redox Systems of the Anaerobe *Desulfovibrio vulgaris* Points Out Pyruvate:Ferredoxin Oxidoreductase as a New Target for Thioredoxin 1. *Journal of Biological Chemistry* 286(10):7812-7821.
5. McCarver AC & Lessner DJ (2014) Molecular characterization of the thioredoxin system from *Methanosarcina acetivorans*. *The FEBS journal* 281(20):4598-4611.
6. Grimaldi P, *et al.* (2008) Characterisation of the components of the thioredoxin system in the archaeon *Sulfolobus solfataricus*. *Extremophiles : life under extreme conditions* 12(4):553-562.
7. Ruggiero A, *et al.* (2009) Structure and stability of a thioredoxin reductase from *Sulfolobus solfataricus*: a thermostable protein with two functions. *Biochimica et biophysica acta* 1794(3):554-562.
8. Hernandez HH, Jaquez OA, Hamill MJ, Elliott SJ, & Drennan CL (2008) Thioredoxin reductase from *Thermoplasma acidophilum*: a new twist on redox regulation. *Biochemistry* 47(37):9728-9737.
9. Yang X & Ma K (2010) Characterization of a thioredoxin-thioredoxin reductase system from the hyperthermophilic bacterium *Thermotoga maritima*. *Journal of bacteriology* 192(5):1370-1376.
